# Supplementary material for: Rubus ellipticus Sm. Fruit Extract Mediated Zinc Oxide Nanoparticles: A Green Approach for Dye Degradation and Biomedical Applications
Source: MDPI journal article supplement (doi:10.3390/ma15103470), 2022-04-06
Supplement: s1 [file s1]

Supplementary Materials:

# ***Rubus ellipticus* Sm. Fruit Extract Mediated Zinc Oxide Nanoparticles: A Green Approach for Dye Degradation and Biomedical Applications**

Jyoti Dhatwalia <sup>1</sup>, Amita Kumari <sup>1,\*</sup>, Ankush Chauhan <sup>2</sup>, Kumari Mansi <sup>3</sup>, Shabnam Thakur <sup>1</sup>, Reena V. Saini <sup>4</sup>, Ishita Guleria <sup>1</sup>, Sohan Lal <sup>1</sup>, Ashwani Kumar <sup>5</sup>, Khalid Mujasam Batoo <sup>6</sup>, Byung Hyune Choi <sup>7</sup>, Amanda-Lee E. Manicum <sup>8</sup> and Rajesh Kumar <sup>9,\*</sup>

**Table S1.** Antioxidant activity of fruit extract and ZnO-NPs.

| Antioxidant assays                                   | Concentrations | ZnO-NPs      | Aqueous fruit extract | Positive control |
|------------------------------------------------------|----------------|--------------|-----------------------|------------------|
| <b>DPPH</b><br>(% Inhibition)                        | 20 µg/ml       | 40.29 ± 0.72 | 45.55 ± 0.82          | 50.81 ± 1.02     |
|                                                      | 40 µg/ml       | 43.16 ± 0.62 | 52.79 ± 0.92          | 57.98 ± 0.54     |
|                                                      | 60 µg/ml       | 46.99 ± 0.31 | 59.97 ± 0.96          | 64.06 ± 1.13     |
|                                                      | 80 µg/ml       | 51.22 ± 0.61 | 72.46 ± 1.19          | 74.11 ± 0.92     |
|                                                      | 100 µg/ml      | 55.18 ± 0.97 | 81.69 ± 1.05          | 79.36 ± 0.51     |
| <b>ABTS</b><br>(% Inhibition)                        | 20 µg/ml       | 32.29 ± 0.73 | 41.18 ± 0.56          | 46.32 ± 0.92     |
|                                                      | 40 µg/ml       | 38.13 ± 0.78 | 51.13 ± 0.66          | 55.09 ± 0.74     |
|                                                      | 60 µg/ml       | 43.76 ± 0.51 | 58.63 ± 0.58          | 62.57 ± 0.68     |
|                                                      | 80 µg/ml       | 47.74 ± 0.51 | 67.08 ± 0.48          | 74.63 ± 1.22     |
|                                                      | 100 µg/ml      | 52.77 ± 0.46 | 74.91 ± 0.56          | 77.72 ± 1.47     |
| <b>FRAP</b><br>(µM/mL FeSO <sub>4</sub> equivalents) | 20 µg/ml       | 21.42 ± 0.63 | 37.09 ± 0.68          | 40.93 ± 0.63     |
|                                                      | 40 µg/ml       | 27.37 ± 0.53 | 43.06 ± 1.25          | 48.92 ± 1.66     |
|                                                      | 60 µg/ml       | 30.23 ± 0.69 | 48.03 ± 1.23          | 55.53 ± 1.25     |
|                                                      | 80 µg/ml       | 34.48 ± 0.76 | 51.98 ± 1.31          | 59.31 ± 1.34     |
|                                                      | 100 µg/ml      | 40.23 ± 1.14 | 56.94 ± 1.21          | 64.54 ± 1.59     |

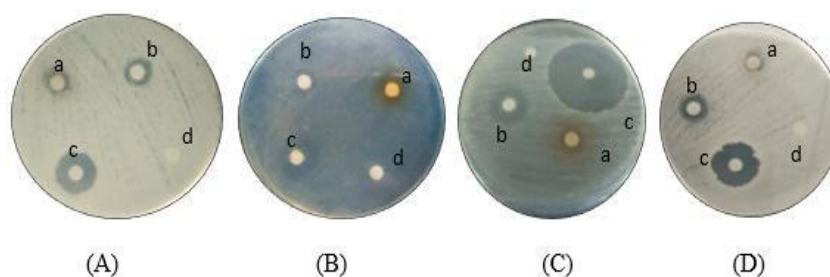

**Figure S1.** Antibacterial activity of (a- 300 µg; aqueous extract, b- 300 µg; ZnO-NPs, c- 50 µg; Ampicillin, d- negative control (DMSO-10 µl) fruit extract and ZnO-NPs against *E. coli* (A), *P. aeruginosa* (B), *B. subtilis* (C), *S. aureus* (D).

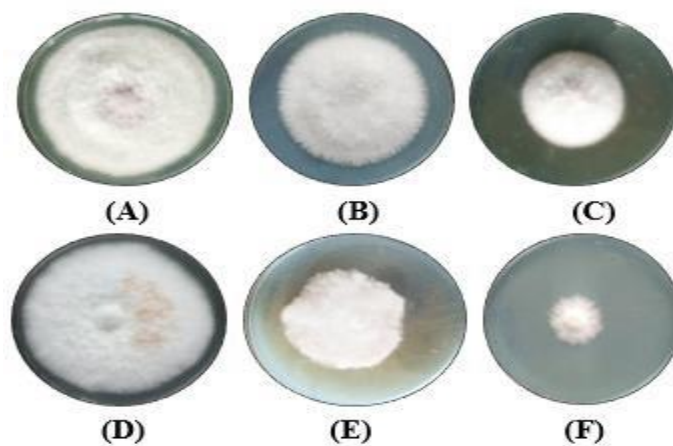

**Figure S2.** Antifungal activity against *F. oxysporum* and *R. necatrix*; A and D- *F. oxysporum* and *R. necatrix* Control (Without extract and nanoparticles), B and E- Aqueous extract (300  $\mu$ g), C and F- ZnO-NPs (300  $\mu$ g).

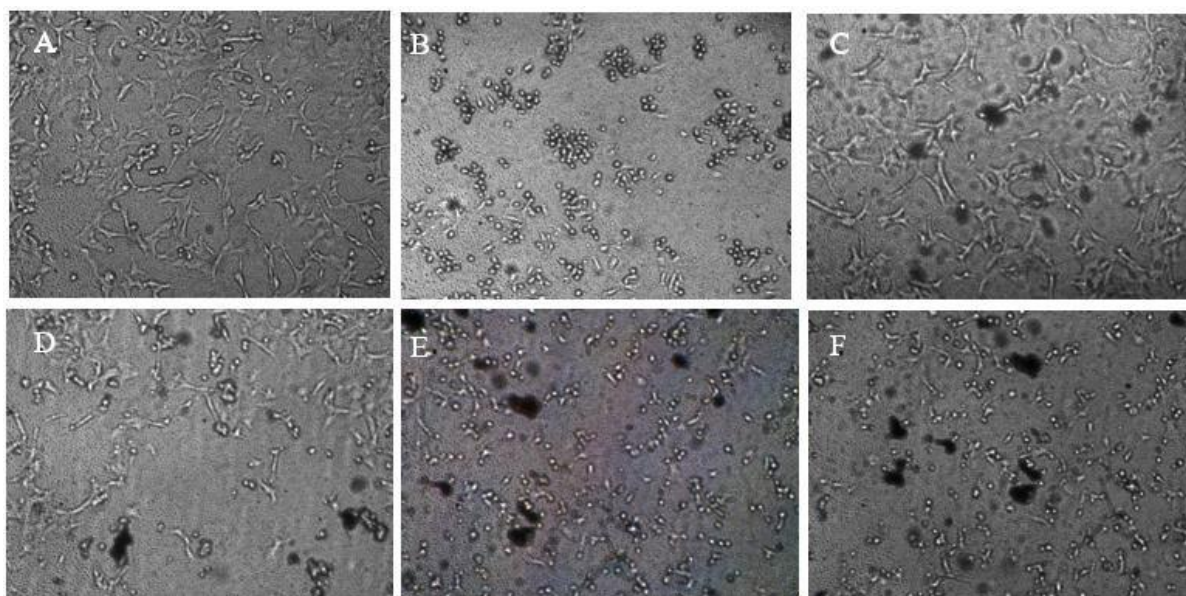

**Figure S3.** Microscopic images of A549 cell before and after treatment [Cells alone (A); Cells treated with Paclitaxel (B), 25  $\mu$ g ZnO-NPs (C), 50  $\mu$ g ZnO-NPs (D), 100  $\mu$ g ZnO-NPs (E), and 200  $\mu$ g ZnO-NPs (F)].
